# Supplementary material for: Indoor Air Quality (IAQ) Management in Hong Kong: The Way Forward
Source: MDPI journal article supplement (doi:10.3390/atmos15050546), 2024-04-29
Supplement: s1 [file s1]

# Supplementary Materials: Indoor Air Quality (IAQ) Management in Hong Kong: The Way Forward

Tsz-Wun Tsang, Kwok-Wai Mui and Ling-Tim Wong \*

Table S1: Recommended measurement methods for IAQ parameters in reviewed IAQ management policies and standards.

Minimum number of sampling points

| Place       | IAQ management policies           | Total floor area (m <sup>2</sup> ) | Minimum number of sampling points |
|-------------|-----------------------------------|------------------------------------|-----------------------------------|
| Hong Kong   | IAQ Certification Scheme          | < 3,000                            | 1 per 500 m <sup>2</sup>          |
|             |                                   | 3,000 - < 5,000                    | 8                                 |
|             |                                   | 5,000 - < 10,000                   | 12                                |
|             |                                   | 10,000 - < 15,000                  | 15                                |
|             |                                   | 15,000 - < 20,000                  | 18                                |
|             |                                   | 20,000 - < 30,000                  | 21                                |
|             |                                   | ≥ 30,000                           | 1 per 1,200 m <sup>2</sup>        |
| South Korea | Indoor Air Quality Control Act    | ≤10,000                            | 2                                 |
|             |                                   | > 10,000 - ≤ 20,000                | 3                                 |
|             |                                   | > 20,000                           | 4                                 |
| Taiwan      | Indoor Air Quality Management Act | ≤ 5,000                            | 1                                 |
|             |                                   | > 5,000 - ≤ 15,000                 | 2                                 |
|             |                                   | > 15,000 - ≤ 30,000                | 3                                 |
|             |                                   | > 30,000                           | 4                                 |

## Sampling collection location and conditions

| Place       | IAQ management policies                                                             | Requirement                                                                                                                                                                                                                                                                                                                                                                                                                                                                                                                                                                                                                                                                                                                                                                                                                                                                                                                                                                                                                                                                                                                                                                                                                                                                                                                                                                                                                            |
|-------------|-------------------------------------------------------------------------------------|----------------------------------------------------------------------------------------------------------------------------------------------------------------------------------------------------------------------------------------------------------------------------------------------------------------------------------------------------------------------------------------------------------------------------------------------------------------------------------------------------------------------------------------------------------------------------------------------------------------------------------------------------------------------------------------------------------------------------------------------------------------------------------------------------------------------------------------------------------------------------------------------------------------------------------------------------------------------------------------------------------------------------------------------------------------------------------------------------------------------------------------------------------------------------------------------------------------------------------------------------------------------------------------------------------------------------------------------------------------------------------------------------------------------------------------|
| Finland     | Classification of Indoor Climate, Construction Cleanliness, and Finishing Materials | <p>The target values apply to the zone of occupancy of a room which usually extends from the floor surface up to 1.8 m from it. It begins 0.6 m from the walls.</p> <hr/> <p>Sampling points should in general be chosen using the following criteria:</p> <ul style="list-style-type: none"> <li>• Distributed among individual MVAC zones;</li> <li>• Include areas under complaints; and</li> <li>• Cover areas with both high and low occupant density.</li> </ul> <hr/> <p>During field data collection, monitors should be placed at the selected sampling locations using the following general guidelines:</p> <ul style="list-style-type: none"> <li>• Representing the primary workstation layout and work activities;</li> <li>• Of minimal disturbance of work activities within the study area;</li> <li>• At least 0.5 m from corners or windows;</li> <li>• At least 0.5 m from walls, partitions, and other vertical surfaces (e.g. file cabinets);</li> </ul>                                                                                                                                                                                                                                                                                                                                                                                                                                                         |
| Hong Kong   | IAQ Certification Scheme                                                            | <ul style="list-style-type: none"> <li>• Not directly in front of air supply diffusers, induction units, floor fans, or heaters, or the exhaled breath of the operator, etc.;</li> <li>• Not under direct sunlight that may impact instrumentation;</li> <li>• Preferably not in hallways or passageways;</li> <li>• At least 1 m away from localised IAQ pollutant sources such as photocopies, printers, etc.;</li> <li>• Not within 3 m of an elevator if sampled at a corridor/lobby;</li> <li>• Not within 2 m of doors;</li> <li>• Not obstructive to, or interfering with, occupant egresses from the study area under normal or emergency situations;</li> <li>• Not at the junction connected to stations of public transport facilities; and</li> <li>• Placing inlets of samplers/monitors at a height of about 1.1 m above the floor.</li> </ul> <hr/> <p>A place that can represent the pollution level of the target facility and where there are many people using the facility.</p> <hr/> <p>There should be no direct source of pollutants in the adjacent area, and the sample is collected at a height of 1.2 to 1.5 m from the floor at the centre point of the sampling point.</p> <hr/> <p>A place as far away as possible from natural ventilation or mechanical ventilation equipment.</p> <hr/> <p>Conducted in an actual operating environment within the time the facility is actually operating.</p> <hr/> |
| South Korea | Indoor Air Quality Control Act                                                      | <hr/> <p>Areas with large occupancy and traffic.</p> <hr/> <p>At least 3 m away from the doorway, elevator, or the vent of the external air intake facility and the openable window.</p> <hr/> <p>At a distance of 1.5 to 3 m from the floor.</p> <hr/>                                                                                                                                                                                                                                                                                                                                                                                                                                                                                                                                                                                                                                                                                                                                                                                                                                                                                                                                                                                                                                                                                                                                                                                |
| Taiwan      | Indoor Air Quality Management Act                                                   |                                                                                                                                                                                                                                                                                                                                                                                                                                                                                                                                                                                                                                                                                                                                                                                                                                                                                                                                                                                                                                                                                                                                                                                                                                                                                                                                                                                                                                        |

Detection method

| Detection method |                                                 |                                                  |                                                    |                                |                                                                                           |                                                                                                           |                                                                                         |                                                                            |                                                                                        |                                                                                                                     |               |
|------------------|-------------------------------------------------|--------------------------------------------------|----------------------------------------------------|--------------------------------|-------------------------------------------------------------------------------------------|-----------------------------------------------------------------------------------------------------------|-----------------------------------------------------------------------------------------|----------------------------------------------------------------------------|----------------------------------------------------------------------------------------|---------------------------------------------------------------------------------------------------------------------|---------------|
| Place            | IAQ management policies                         | PM <sub>10</sub> & PM <sub>2.5</sub>             | CO <sub>2</sub>                                    | CO                             | HCHO                                                                                      | NO <sub>2</sub>                                                                                           | O <sub>3</sub>                                                                          | Rn                                                                         | TVOC                                                                                   | bacteria                                                                                                            | mould         |
| Australia        | National Construction Code                      | Gravimetric, optical, or microbalance principles | Infrared analysers                                 | Infrared analysers             | Handheld instruments, or laboratory analysis                                              | Infrared analysers                                                                                        | -                                                                                       | -                                                                          | Handheld instruments, or laboratory analysis                                           | -                                                                                                                   | -             |
| China            | Hygiene Indicators and Limits for Public Places | Impact weighting method                          | Non-dispersive infrared method                     | Non-dispersive infrared method | AHMT spectrophotometry, MBTH spectrophotometry, or high-performance liquid chromatography | Saltzman method, or chemiluminescence                                                                     | Indigo disulfonate spectrophotometry, or UV-Vis Spectroscopy                            | Alpha trail detection method, continuous measurement, or charcoal canister | Tenax GR thermal desorption-gas chromatography mass spectrometry                       | Collision law                                                                                                       | Collision law |
| Hong Kong        | IAQ Certification Scheme                        | Gravimetric, optical, or piezoelectric           | Non-dispersive infrared method, or electrochemical | -                              | High-performance liquid chromatography                                                    | Absorbent filter containing triethanolamine followed by spectrophotometry, or real-time portable analyser | Heated metal oxide semiconductor, electrochemical, UV photometric, or chemiluminescence | Alpha trail detection method, or charcoal canister                         | Whole air sampling followed by direct flame ionization detection, PID, or FID detector | Andersen multi-hole impactor, Reuter Centrifugal Sample, Surface Air System bioaerosol sampler, or cyclone scrubber | Checklist     |
| South Korea      | Indoor Air Quality Control Act                  | Weight method                                    | Non-dispersive infrared method                     | Non-dispersive infrared method | 2,4 DNPH cartridge and liquid chromatographic method                                      | Chemiluminescence                                                                                         | -                                                                                       | Alpha trail detection method                                               | Solid adsorption tube and gas chromatography (MS/FID)                                  | Collision law                                                                                                       | Collision law |
